# Supplementary material for: Consolidating a Pb–X framework via multifunctional passivation with fluorinated zwitterions for efficient and stable perovskite solar cells
Source: Royal Society of Chemistry journal article supplement (doi:10.1039/d2ta00653g), 2022-01-01
Supplement: d2ta00653g1.pdf [file d2ta00653g1.pdf]

**Table 1 performance comparisons evaluating the performance of this passivation technique and the fabricated perovskite composite in comparison to state-of-the-art works published recently**

| Perovskite composite                                                                                                                 | Device structure                                                   | Perovskite passivator | $J_{SC}$ (mA·cm <sup>-2</sup> ) | $V_{OC}$ (V) | FF (%) | PCE (%) | Humidity stability | Test conditions | Ref.      |
|--------------------------------------------------------------------------------------------------------------------------------------|--------------------------------------------------------------------|-----------------------|---------------------------------|--------------|--------|---------|--------------------|-----------------|-----------|
|                                                                                                                                      |                                                                    |                       |                                 |              |        |         | $T_{80}$ (hours)   |                 |           |
| Cs <sub>0.065</sub> (FA <sub>0.70</sub> MA <sub>0.30</sub> ) <sub>0.935</sub> Pb(I <sub>0.96</sub> Br <sub>0.04</sub> ) <sub>3</sub> | FTO/SnO <sub>2</sub> /perovskite/spiro-OMeTAD/Ag                   | D-PFPAA               | 23.50                           | 1.15         | 79.80  | 21.56   | 500                | 45% RH*         | This work |
| Cs <sub>0.05</sub> (FA <sub>0.83</sub> MA <sub>0.17</sub> ) <sub>0.95</sub> Pb(I <sub>0.83</sub> Br <sub>0.17</sub> ) <sub>3</sub>   | FTO/SnO <sub>2</sub> /perovskite/spiro-OMeTAD/Au                   | Fe                    | 24.11                           | 1.14         | 78.01  | 21.51   | -                  | -               | 1         |
| Cs <sub>0.05</sub> (FA <sub>0.85</sub> MA <sub>0.15</sub> ) <sub>0.95</sub> Pb(I <sub>0.85</sub> Br <sub>0.15</sub> ) <sub>3</sub>   | ITO/SnO <sub>2</sub> /perovskite/spiro-OMeTAD/Au                   | PTI                   | 21.79                           | 1.13         | 77.85  | 19.12   | 350                | 25-45% RH       | 2         |
| Cs <sub>0.05</sub> FA <sub>0.80</sub> MA <sub>0.15</sub> Pb(I <sub>0.85</sub> Br <sub>0.15</sub> ) <sub>3</sub>                      | ITO/SnO <sub>2</sub> /perovskite/spiro-OMeTAD/MoO <sub>3</sub> /Ag | PFPAA                 | 23.68                           | 1.19         | 79.37  | 22.42   | 350                | 45% RH          | 3         |
| Cs <sub>0.05</sub> (FA <sub>0.90</sub> MA <sub>0.10</sub> ) <sub>0.95</sub> Pb(I <sub>0.90</sub> Br <sub>0.10</sub> ) <sub>3</sub>   | ITO/SnO <sub>2</sub> /perovskite/spiro-OMeTAD/Ag                   | DMAEMA                | 23.86                           | 1.10         | 82.00  | 21.52   | -                  | -               | 4         |
| Cs <sub>0.175</sub> FA <sub>0.75</sub> MA <sub>0.075</sub> PbI <sub>2.92</sub> Br <sub>0.08</sub>                                    | FTO/SnO <sub>2</sub> /perovskite/spiro-OMeTAD/Au                   | Thymine               | 24.07                           | 1.02         | 78.96  | 19.46   | 750                | 50 ± 5% RH      | 5         |
| Cs <sub>0.05</sub> (FA <sub>0.83</sub> MA <sub>0.17</sub> ) <sub>0.95</sub> Pb(I <sub>0.83</sub> Br <sub>0.17</sub> ) <sub>3</sub>   | FTO/TiO <sub>2</sub> /perovskite/spiro-OMeTAD/Au                   | PrCl <sub>3</sub>     | 22.73                           | 1.06         | 76.00  | 18.56   | 90                 | 50% RH          | 6         |
| Cs <sub>0.05</sub> (FA <sub>0.85</sub> MA <sub>0.15</sub> ) <sub>0.95</sub> PbI <sub>2.55</sub> Br <sub>0.45</sub>                   | FTO/TiO <sub>2</sub> /perovskite/spiro-OMeTAD/Au                   | PFAD                  | 24.04                           | 1.11         | 76.27  | 20.48   | 840                | 30% RH          | 7         |
| Cs <sub>0.05</sub> (FA <sub>0.83</sub> MA <sub>0.17</sub> ) <sub>0.95</sub> Pb(I <sub>0.83</sub> Br <sub>0.17</sub> ) <sub>3</sub>   | FTO/SnO <sub>2</sub> /perovskite/spiro-OMeTAD/Au                   | CHEA                  | 23.23                           | 1.17         | 79.14  | 21.53   | 720                | 15% RH          | 8         |
| Cs <sub>0.05</sub> (FA <sub>0.85</sub> MA <sub>0.15</sub> ) <sub>0.95</sub> Pb(I <sub>0.85</sub> Br <sub>0.15</sub> ) <sub>3</sub>   | FTO/SnO <sub>2</sub> /perovskite/spiro-OMeTAD/Ag                   | APMS                  | 23.03                           | 1.15         | 78.20  | 20.72   | 200                | 50-60% RH       | 9         |
| Cs <sub>0.05</sub> (FA <sub>0.85</sub> MA <sub>0.15</sub> ) <sub>0.95</sub> Pb(I <sub>0.85</sub> Br <sub>0.15</sub> ) <sub>3</sub>   | ITO/SnO <sub>2</sub> /perovskite/spiro-OMeTAD/Ag                   | SDBS                  | 23.54                           | 1.13         | 78.50  | 20.88   | 475                | 40 ± 5% RH      | 10        |

\* RH: relative humidity

1. Q. Chang, F. Wang, W. Xu, A. Wang, Y. Liu, J. Wang, Y. Yun, S. Gao, K. Xiao and L. Zhang, *Angew. Chem. Int. Ed.*, 2021, **60**, 25567-25574.
2. D.-w. Kim, J. Choi, J. Byun, J. T. Kim, G. S. Lee, J. G. Kim, D. Kim, P. Boonmongkolras, P. F. McMillan and H. M. Lee, *ACS Appl. Mater. Interfaces*, 2021, DOI: 10.1021/acsami.1c19587.
3. S. Xiong, Z. Hou, W. Dong, D. Li, J. Yang, R. Bai, Y. Wu, D. Li, H. Wu and Z. Ma, *Adv. Energy Mater.*, 2021, **11**, 2101394.
4. R. Ma, J. Zheng, Y. Tian, C. Li, B. Lyu, L. Lu, Z. Su, L. Chen, X. Gao and J. X. Tang, *Adv. Funct. Mater.*, 2021, 2105290.
5. Y. Zhao, J. Zhang, J. Sun, Q. Zhou, Q. Liu, J. Chen, W. Ge, Q. Tian, B. Fan and H. Bai, *ACS Appl. Energy Mater.*, 2021, **4**, 3310-3316.
6. L. Sun, C. Zhang, L. Yan, L. Gao and T. Ma, *Journal of Solid State Chemistry*, 2022, **307**, DOI: 10.1016/j.jssc.2021.122826.

7. M. Long, J. Zhang, P. Guo, K. Zhang, C. Liu, Q. Ye and H. Wang, *Acs Appl. Energy Mater.*, 2021, **4**, 10484-10492.
8. M. Liao, J. Liu, T. Zuo, L. Meng, Y. Yang, J. Wu, C. Lu, W. Sun and Y. Xie, *Acs Appl. Energy Mater.*, 2021, **4**, 12848-12857.
9. R. Zheng, S. Zhao, H. Zhang, H. Li, J. Zhuang, X. Liu, H. Li and H. Wang, *Solar Energy*, 2021, **224**, 472-479.
10. Z. Guo, T. Gao, J. Zhuang, X. Liu, H. Guo, J. Yi, Z. Ma, H. Li and X. Cheng, *Acs Appl. Energy Mater.*, 2021, **4**, 4910-4918.
