# Supplementary material for: Consolidating a Pb–X framework via multifunctional passivation with fluorinated zwitterions for efficient and stable perovskite solar cells
Source: Royal Society of Chemistry journal article supplement (doi:10.1039/d2ta00653g), 2022-01-01
Supplement: d2ta00653g2.pdf [file d2ta00653g2.pdf]

*Supplementary Information*

Consolidating Pb-X Framework via  
Multifunctional Passivation of Fluorinated  
Zwitterion for Efficient and Stable Perovskite  
Solar Cells

Hanyu Wang,<sup>\*a</sup> Wenjing Zou,<sup>a</sup> Yukun Ouyang,<sup>a</sup> Xiong Deng,<sup>b</sup> Hu Luo,<sup>a</sup> Juehao Xu,<sup>a</sup>

Xingchong Liu,<sup>a</sup> Haimin Li,<sup>a</sup> Xiaoli Gong,<sup>a</sup> Yue Lei,<sup>a</sup> Yafei Ni,<sup>a</sup> Yongshan Peng<sup>a</sup>

<sup>a</sup>School of New Energy and Materials, Southwest Petroleum University, Chengdu, 610500,  
China

<sup>b</sup>School of Petroleum and Natural Gas Engineering, Southwest Petroleum University, Chengdu,  
610500, China

<sup>\*</sup>Corresponding authors. E-mail address: hywang@swpu.edu.cn

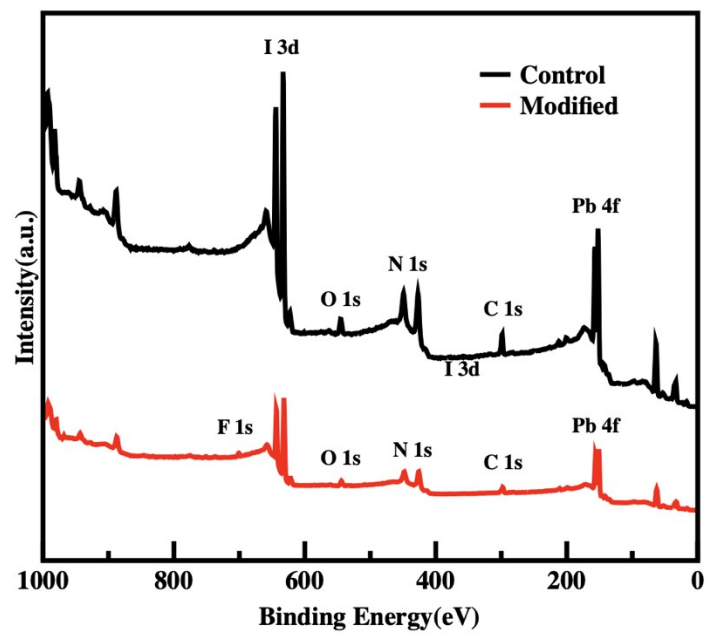

**Figure S1.** XPS measurement result of pure perovskite film and perovskite/ D-PFPAA films.

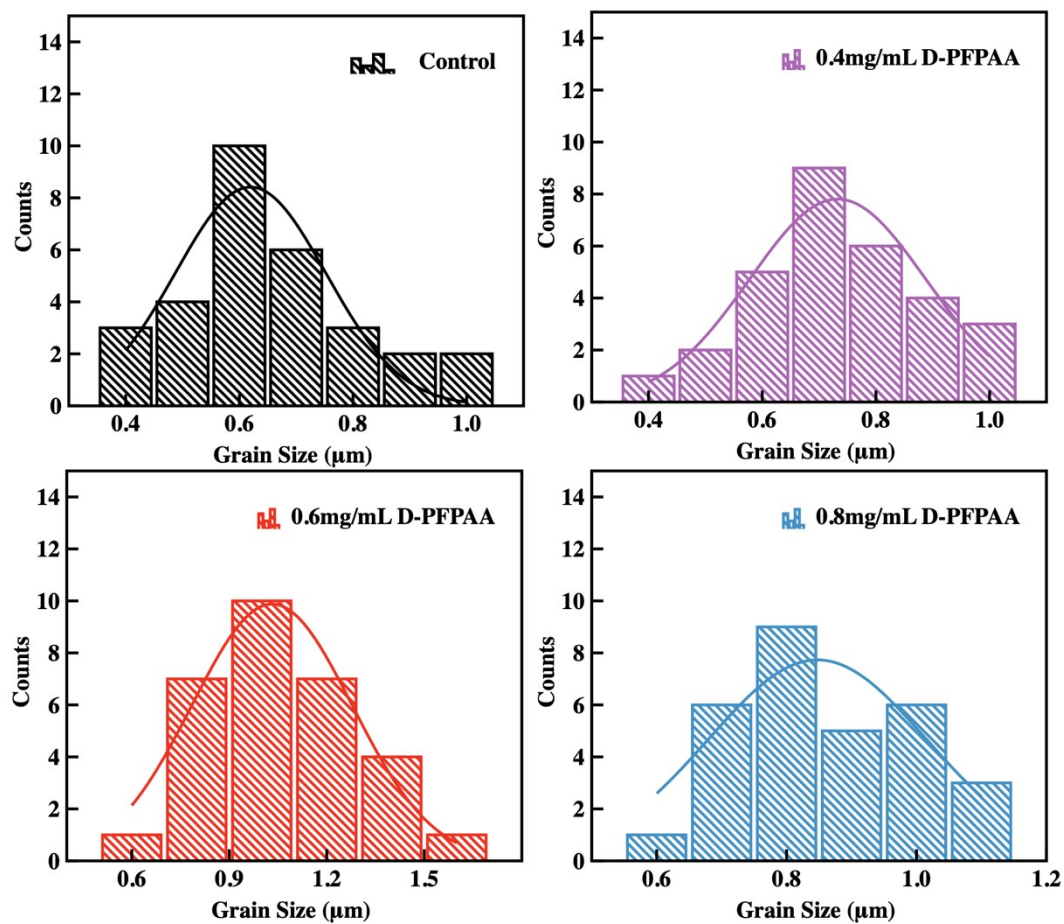

**Figure S2.** The histogram of the grain size distribution obtained from the SEM for the control and D-PFPAA modified perovskite films.

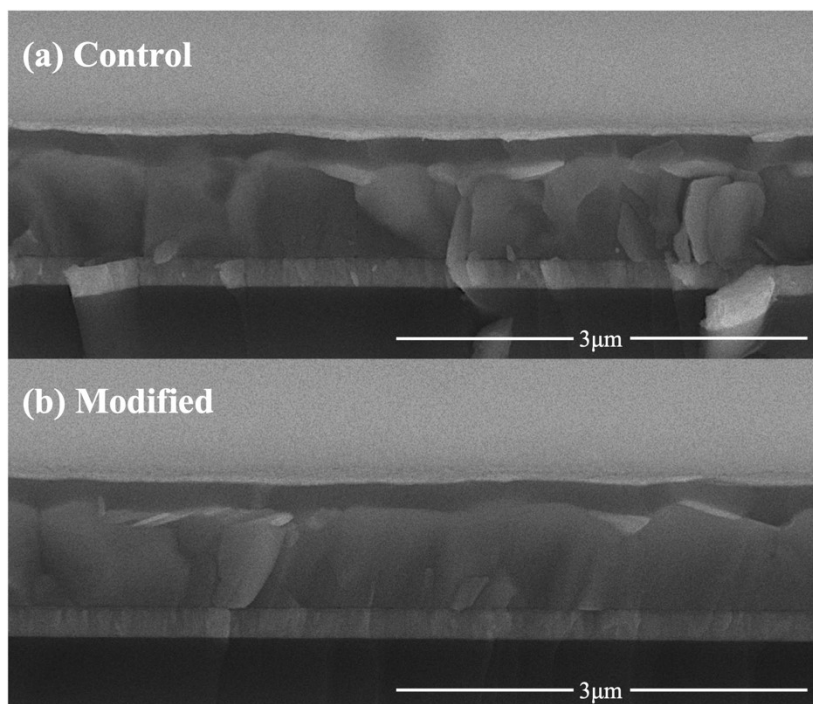

**Figure S3.** Cross-sectional SEM image of control and D-PFPAA modified device.

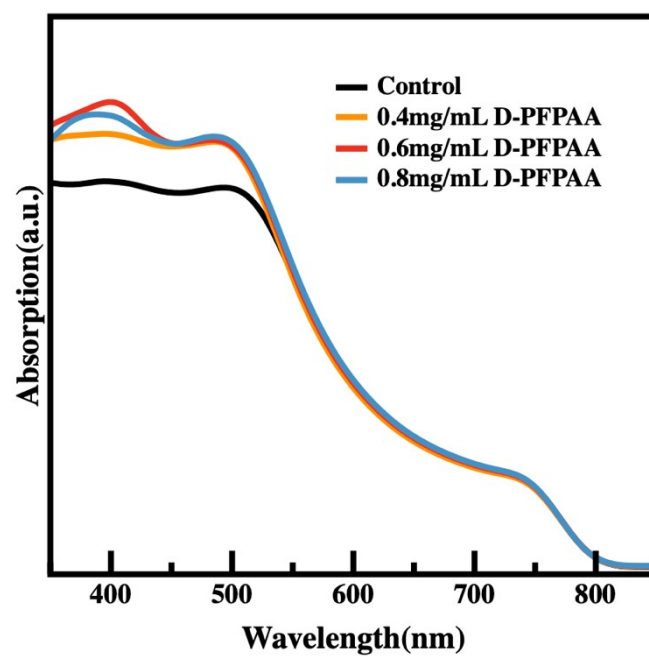

**Figure S4.** The UV-vis spectra of pure perovskite film and perovskite/ D-PFPAA films.

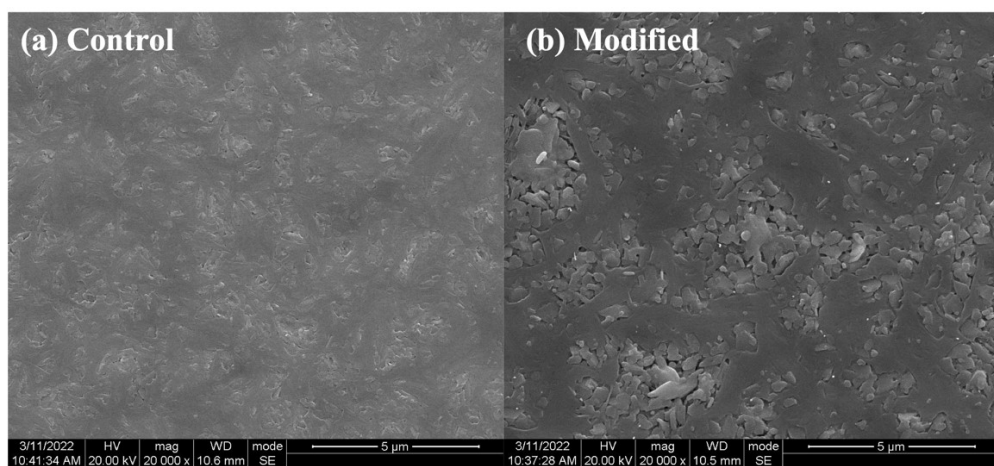

**Figure S5.** Top-view SEM images of the  $\text{PbI}_2$  film: (a) control, (b) D-PFPAA modified.

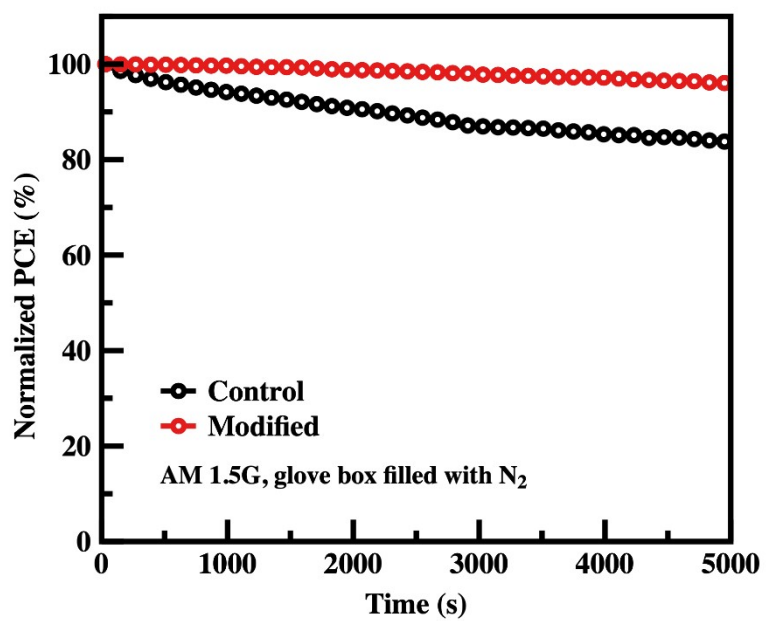

**Figure S6.** steady-state power output at the maximum power point (0.94 V for the control device and 0.99 V for the D-PFPAA-modified device).

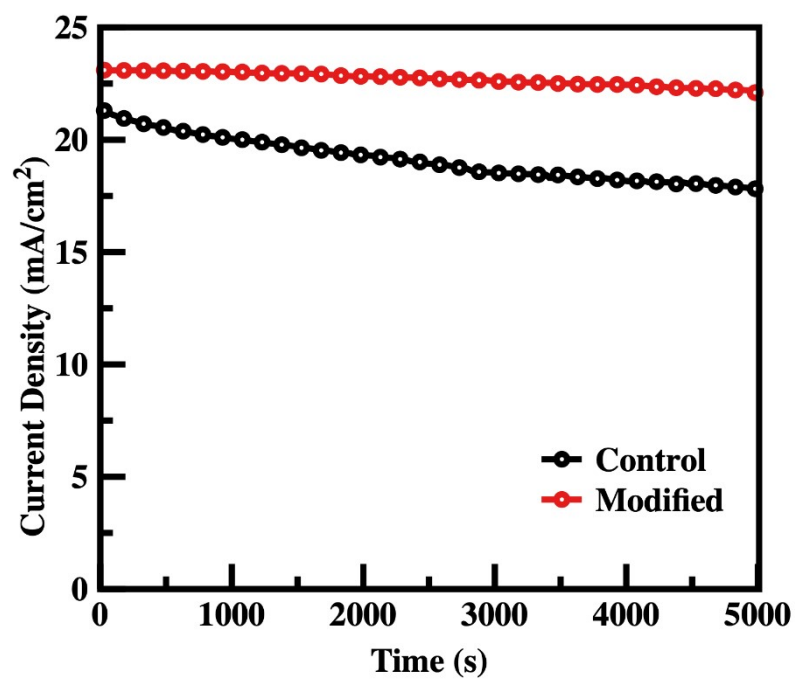

**Figure S7.** The photocurrent stability of the control device and modified device measured at the maximum power point.



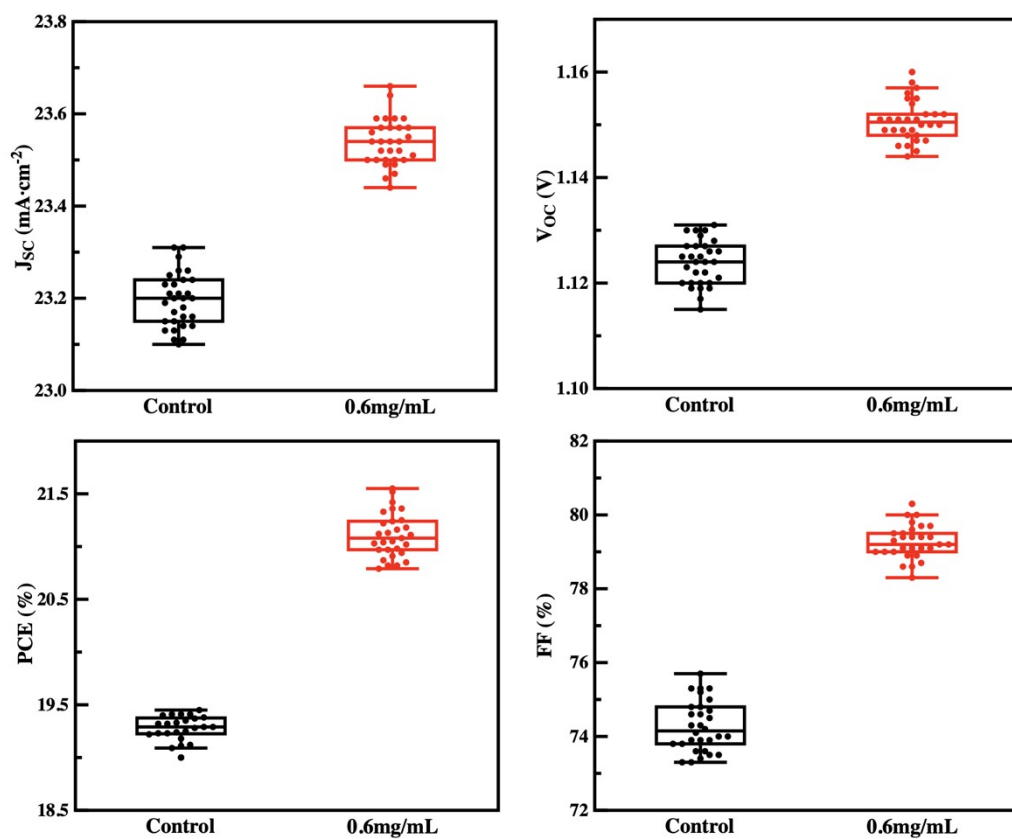

**Figure S8.** Statistical distribution of photovoltaic parameters of 30 perovskite devices for control and different concentrations of D-PFPAA modified.

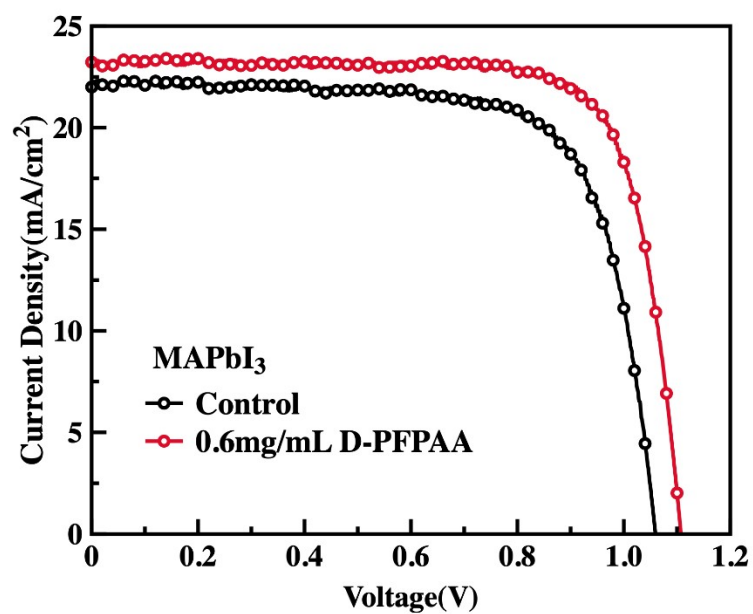

**Figure S9.**  $J$ - $V$  curves of MAPbI<sub>3</sub> PSCs modified with optimal concentration of D-PFPAA (0.6 mg/mL) and the control MAPbI<sub>3</sub> PSCs.

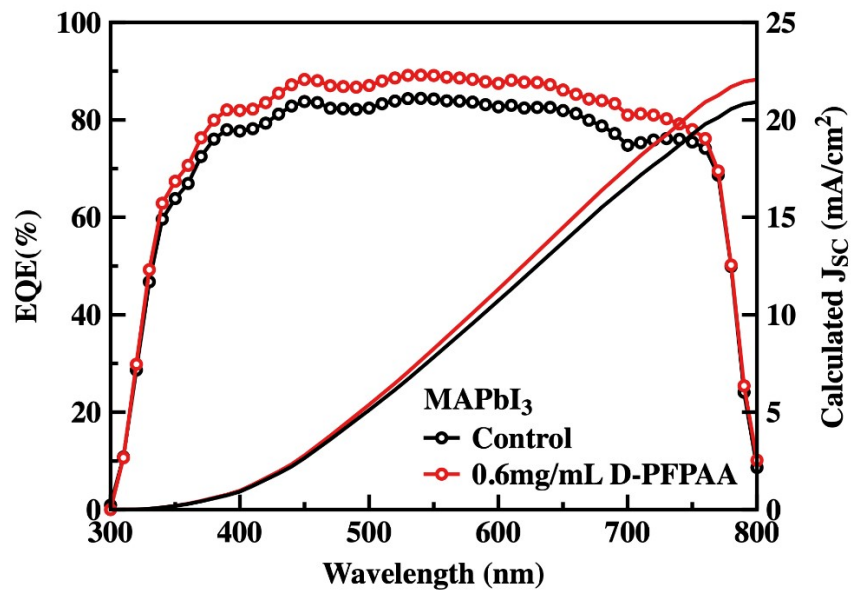

**Figure S10.** EQE and the corresponding integrated  $J_{sc}$  of control and modified MAPbI<sub>3</sub> devices.

**Table S1.** Fitting parameters for the TRPL spectra.

| Sample             | $\tau_{\text{ave}}$ (ns) | $\tau_1$ (ns) | $A_1$ (%) | $\tau_2$ (ns) | $A_2$ (%) |
|--------------------|--------------------------|---------------|-----------|---------------|-----------|
| CsFAMA/ETL         | 603.15                   | 5.22          | 44.46     | 607.26        | 55.54     |
| D-PFPAA·CsFAMA/ETL | 256.18                   | 5.97          | 60.29     | 264.75        | 39.71     |

**Table S2.** Photovoltaic parameters of control and modified MAPbI<sub>3</sub> devices. (Measured under simulated AM 1.5G solar irradiance at 100 mW/cm<sup>2</sup>).

| Device   | $V_{oc}$ | $J_{sc}$ | FF     | PCE    |
|----------|----------|----------|--------|--------|
| Control  | 1.060    | 22.00    | 73.90% | 17.23% |
| 0.6mg/mL | 1.106    | 22.92    | 78.1%  | 19.80% |
